# Supplementary material for: Evaluation of GO-based functional similarity measures using S. cerevisiae protein interaction and expression profile data
Source: PubMed Central journal article supplement (PMC2612010; doi:10.1186/1471-2105-9-472), 2008-11-06

(a)

Biological Process

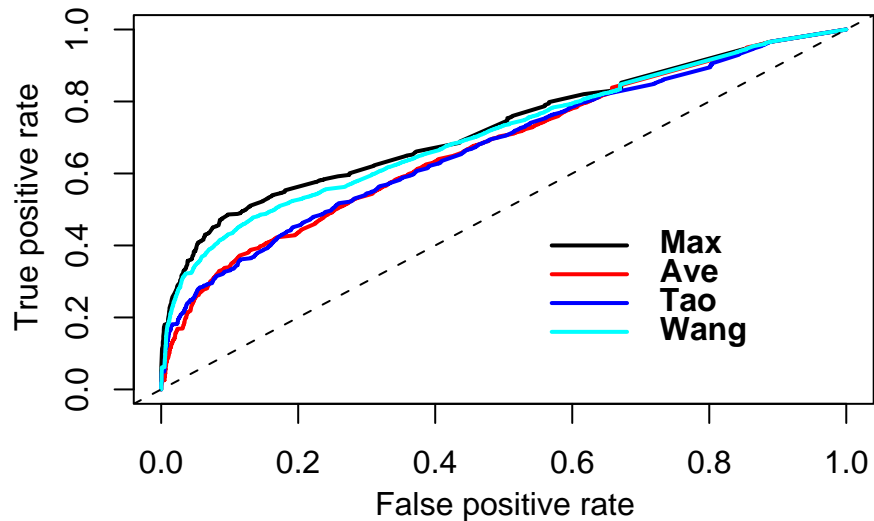

(b)

Molecular Function

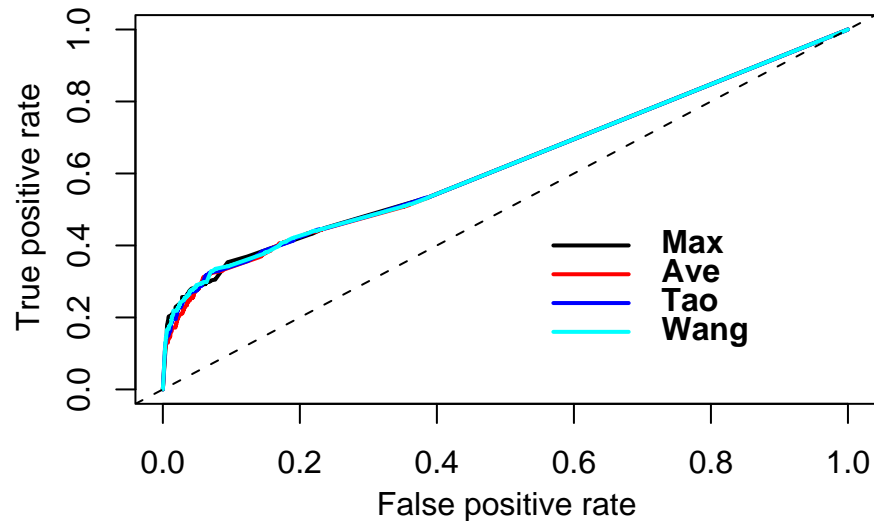

(c)

Cellular Component

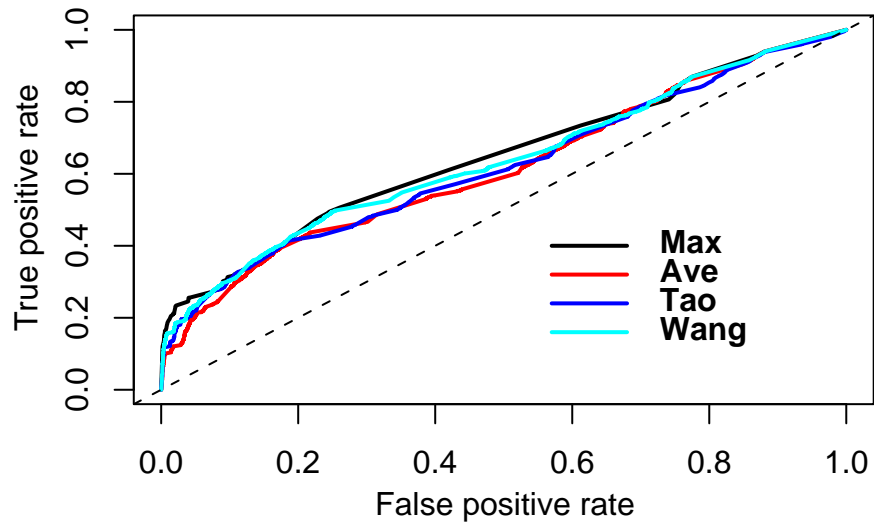

(d)

ALL

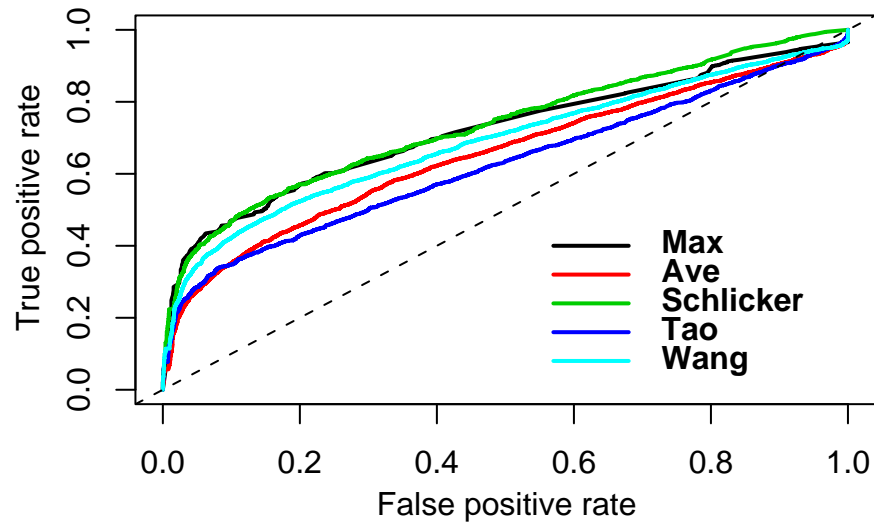

Supplement: 1471-2105-9-472-S2.pdf [file 1471-2105-9-472-S2.pdf]
