# Supplementary material for: Evaluation of GO-based functional similarity measures using S. cerevisiae protein interaction and expression profile data
Source: PubMed Central journal article supplement (PMC2612010; doi:10.1186/1471-2105-9-472), 2008-11-06

Biological Process

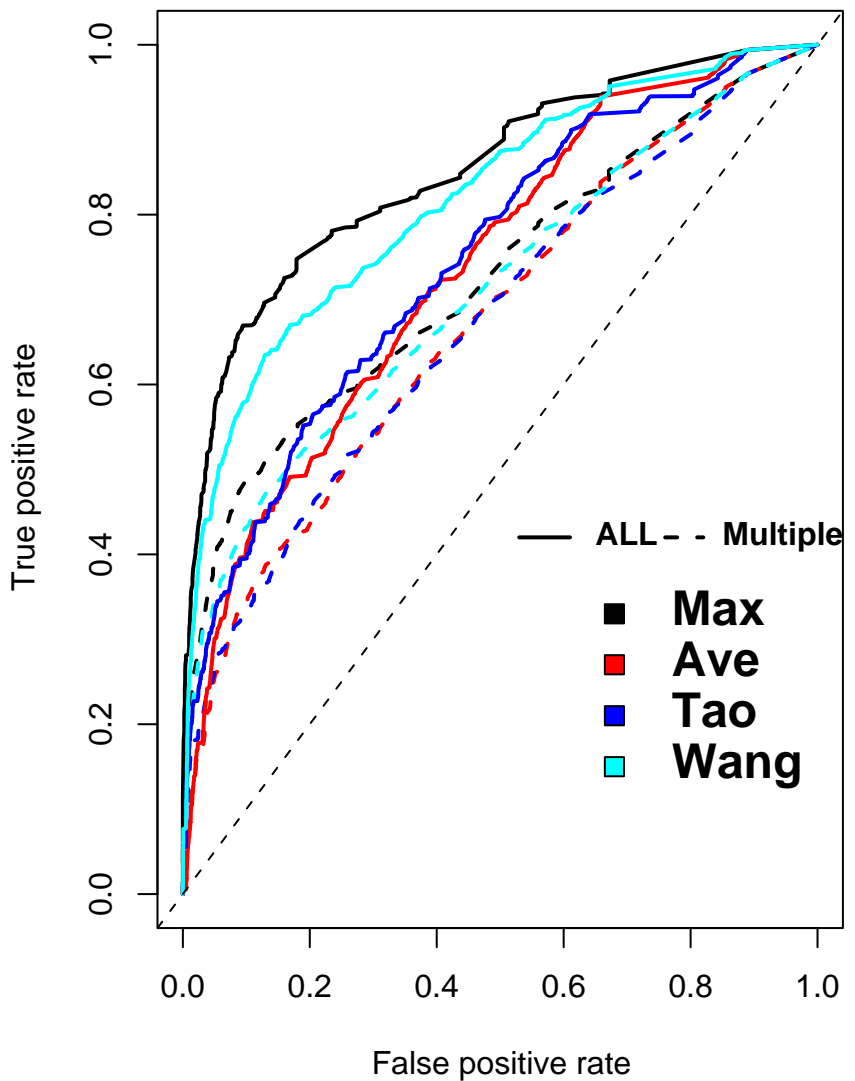

Molecular Function

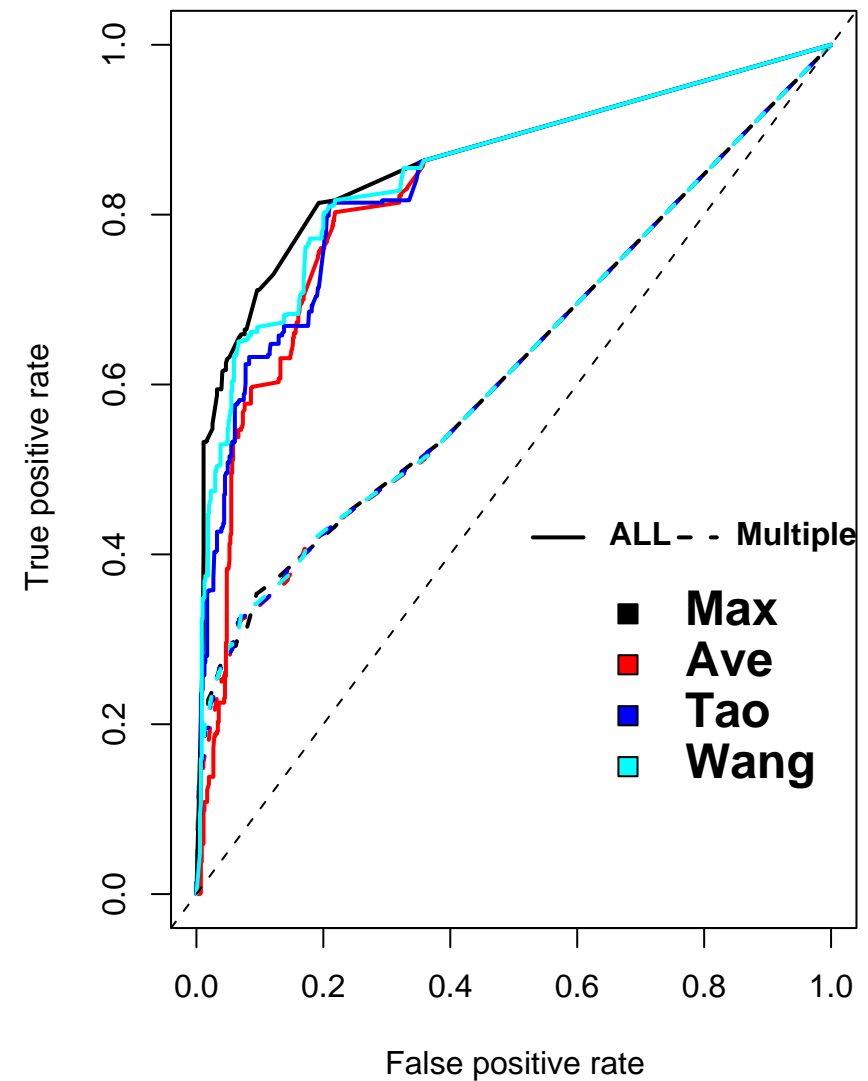

Cellular Component

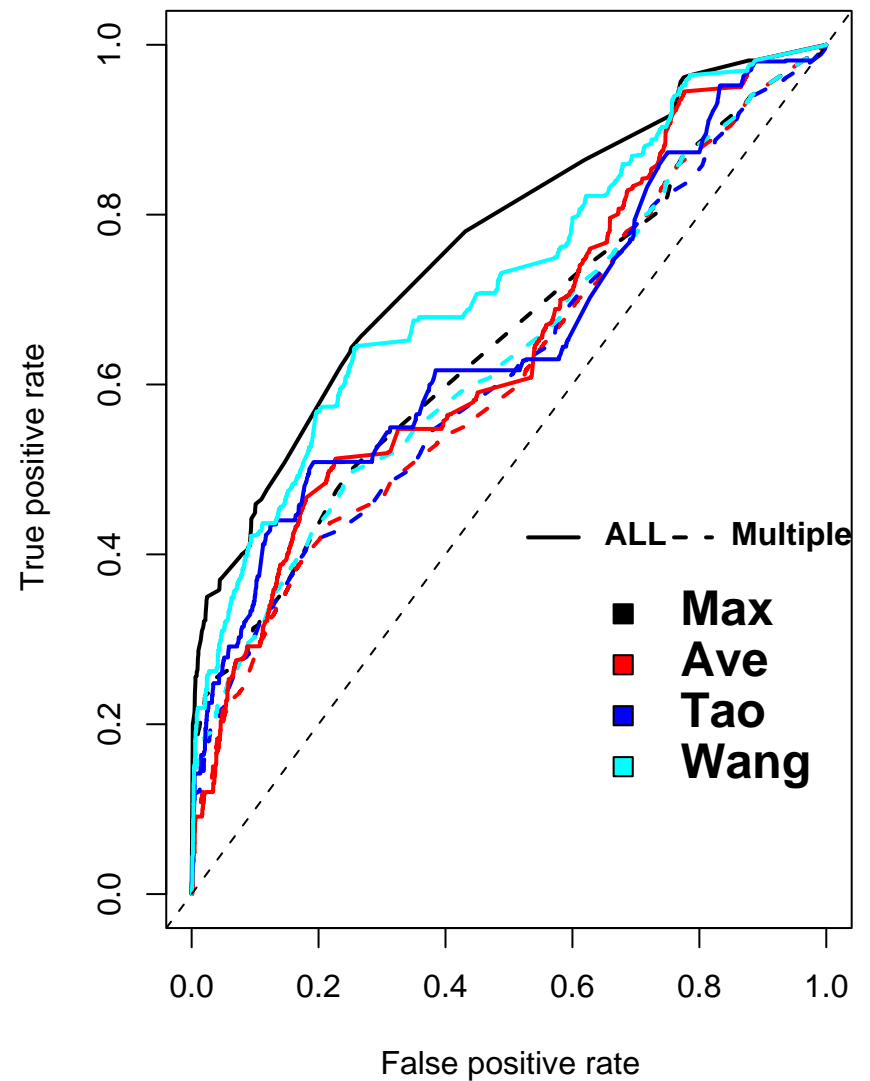

Supplement: 1471-2105-9-472-S3.pdf [file 1471-2105-9-472-S3.pdf]
